# Supplementary material for: Magnetic, long persistent luminescent and mesoporous nanoparticles as trackable transport drug carriers
Source: Royal Society of Chemistry journal article supplement (doi:10.1039/c4tb01721h), 2014-11-19
Supplement: c4tb01721h1.pdf [file c4tb01721h1.pdf]

## Supporting information

### Magnetic, long persistent Luminescent and Mesoporous Nanoparticles as Trackable Transport Carrier for Drug

Junpeng Shi, Haixia Fu, Xia Sun, Jiangshan Shen, Hongwu Zhang\*

Key Lab of Urban Pollutant Conversion, Institute of Urban Environment, Chinese

Academy of Sciences, Xiamen, Fujian 361021, China

\*Correspondence to Hongwu Zhang, Ph.D.

Email address: [hwzhang@iue.ac.cn](mailto:hwzhang@iue.ac.cn) or [hwzhang21st@hotmail.com](mailto:hwzhang21st@hotmail.com)

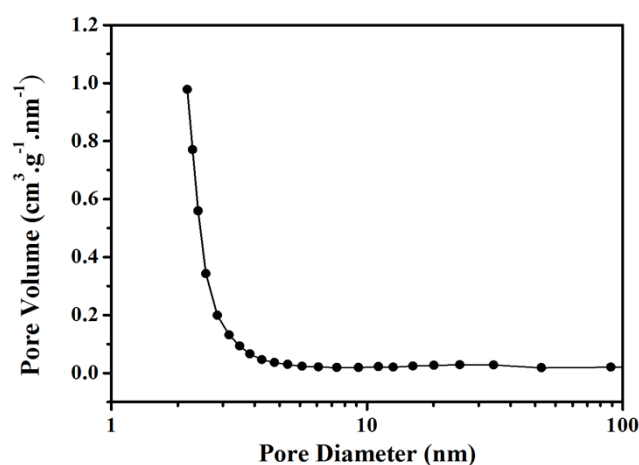

Fig. S1. Pore size distribution of GdSCTP.

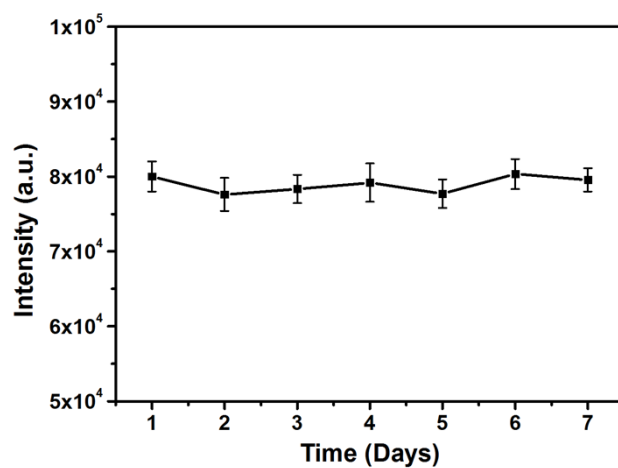

Fig. S2. The luminescent stability of GdSCTP in SBF (pH 7.4).

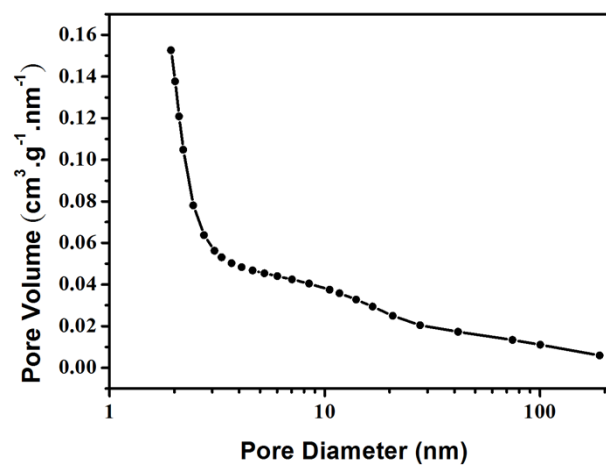

Fig. S3. Pore size distribution of GdSCTP-IBU.
